# Supplementary material for: Antimicrobial, Multidrug Resistance Reversal and Biofilm Formation Inhibitory Effect of Origanum majorana Extracts, Essential Oil and Monoterpenes
Source: MDPI journal article supplement (doi:10.3390/plants11111432), 2022-05-27
Supplement: s1 [file s1]

## SUPPORTING MATERIAL

### **Antimicrobial, multidrug resistance reversal and biofilm formation inhibitory effect of *Origanum majorana* extracts, essential oil and monoterpenes**

Tasneem Sultan Abu Ghazal,<sup>1</sup> Zsuzsanna Schelz,<sup>2</sup> Livia Vidács,<sup>1</sup> Nikoletta Szemerédi,<sup>3</sup>  
Katalin Veres,<sup>1</sup> Gabriella Spengler,<sup>3</sup> Judit Hohmann<sup>1,4\*</sup>

*Department of Pharmacognosy, University of Szeged, 6720 Szeged, Hungary*

*Department of Pharmacodynamics and Biopharmacy, University of Szeged, 6720 Szeged, Hungary*

*Department of Medical Microbiology, Albert Szent-Györgyi Health Center and Albert Szent-Györgyi*

*Medical School, University of Szeged, Semmelweis utca 6, H-6725 Szeged, Hungary*

*Interdisciplinary Centre for Natural Products, University of Szeged, Eötvös u. 6,*

*H-6720 Szeged, Hungary*

## CONTENT

|                                                                                                                                                                                                                   |   |
|-------------------------------------------------------------------------------------------------------------------------------------------------------------------------------------------------------------------|---|
| <b>Figure S1.</b> GC chromatogram of <i>n</i> -hexane extract of <i>Origanum majorana</i> .....                                                                                                                   | 2 |
| <b>Table S1.</b> Composition of the <i>n</i> -hexane extract of <i>Origanum majorana</i><br>determined by GC-MS.....                                                                                              | 2 |
| <b>Table S2.</b> Efflux pump inhibitory activity of marjoram extracts, essential oil and its constituents<br>by real time ethidium bromide accumulation assay on <i>E. coli</i> AG100 strain .....                | 4 |
| <b>Table S3.</b> Efflux pump inhibitory activity of marjoram extracts, essential oil<br>and its constituents by real time ethidium bromide accumulation assay on<br><i>E. coli</i> ATCC 25922 strain .....        | 5 |
| <b>Table S4.</b> Efflux pump inhibitory activity of marjoram extracts, essential oil and its constituents<br>by real time ethidium bromide accumulation assay on <i>S. aureus</i> ATCC 25923 strain .....         | 6 |
| <b>Table S5.</b> Efflux pump inhibitory activity of marjoram extracts, essential oil and<br>its constituents by real time ethidium bromide accumulation assay on <i>S. aureus</i><br>MRSA ATCC 43300 strain ..... | 7 |

**Figure S1.** GC chromatogram of *n*-hexane extract of *Origanum majorana*

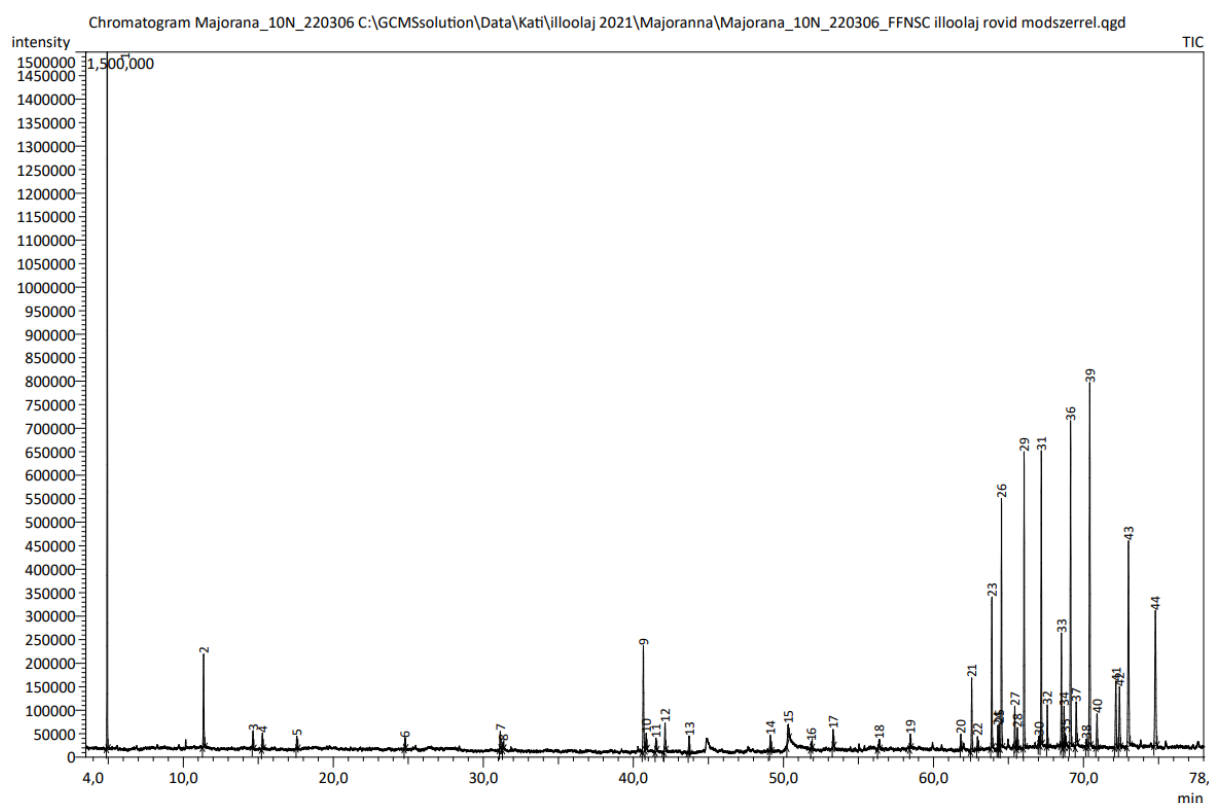

**Table S1.** Composition of the *n*-hexane extract of *Origanum majorana*  
determined by GC-MS

| Peak | Name                                 | RI   | RT<br>(min) | Area    |
|------|--------------------------------------|------|-------------|---------|
| 1    | <i>n</i> -nonane                     | 896  | 4.935       | 1043259 |
| 2    | <b><i>trans</i>-sabinene hydrate</b> | 1099 | 11.357      | 76535   |
| 3    | <b>terpinen-4-ol</b>                 | 1177 | 14.65       | 22450   |
| 4    | <b>terpineol &lt;alpha&gt;</b>       | 1192 | 15.277      | 19055   |
| 5    | <b>linalyl acetate</b>               | 1245 | 17.574      | 19545   |
| 6    | <b>β-caryophyllene</b>               | 1413 | 24.784      | 7847    |
| 7    | <b>spathulenol</b>                   | 1570 | 31.134      | 9087    |
| 8    | caryophyllene oxide                  | 1574 | 31.327      | tr      |
| 9    | neophytadiene                        | 1829 | 40.669      | 63230   |
| 10   | phytone                              | 1835 | 40.865      | 17650   |
| 11   | neophytadiene                        | 1854 | 41.516      | 9549    |
| 12   | heptadec-(4 <i>E</i> )-enol          | 1872 | 42.112      | 15635   |
| 13   | unknown                              | 1920 | 43.724      | 15064   |
| 14   | methyl-linolenate                    | 2089 | 49.125      | 12930   |

|    |                            |      |        |        |
|----|----------------------------|------|--------|--------|
| 15 | ethyl-linolenate           | 2131 | 50.329 | tr     |
| 16 | unknown                    | 2185 | 51.862 | tr     |
| 17 | unknown                    | 2243 | 53.306 | 32002  |
| 18 | unknown                    | 2381 | 56.371 | 15395  |
| 19 | <i>n</i> -pentacosane      | 2487 | 58.455 | 15264  |
| 20 | unknown                    | 2652 | 61.821 | 15431  |
| 21 | <i>n</i> -heptacosane      | 2688 | 62.552 | 83059  |
| 22 | unknown                    | 2709 | 62.939 | 34814  |
| 23 | unknown                    | 2761 | 63.891 | 165279 |
| 24 | unknown                    | 2783 | 64.288 | 21987  |
| 25 | <i>n</i> -octacosane       | 2788 | 64.369 | 24549  |
| 26 | squalene                   | 2797 | 64.535 | 346114 |
| 27 | unknown                    | 2850 | 65.424 | 44384  |
| 28 | unknown                    | 2860 | 65.594 | 19484  |
| 29 | <i>n</i> -nonacosane       | 2887 | 66.041 | 305629 |
| 30 | unknown                    | 2949 | 67.028 | 9378   |
| 31 | <i>n</i> -pentacosane      | 2959 | 67.191 | 292679 |
| 32 | <i>n</i> -triacontane      | 2984 | 67.582 | 48095  |
| 33 | unknown                    | 3041 | 68.528 | 115274 |
| 34 | <i>n</i> -pentatriacontane | 3052 | 68.703 | 40438  |
| 35 | unknown                    | 3056 | 68.783 | 6034   |
| 36 | unknown                    | 3078 | 69.137 | 363428 |
| 37 | unknown                    | 3100 | 69.513 | 91178  |
| 38 | <i>n</i> -hexatriacontane  | 3141 | 70.204 | 9182   |
| 39 | unknown                    | 3154 | 70.414 | 489964 |
| 40 | <i>n</i> -dotriacontane    | 3183 | 70.911 | 48160  |
| 41 | <i>n</i> -octatriacontane  | 3258 | 72.161 | 100530 |
| 42 | <i>n</i> -octatriacontane  | 3272 | 72.4   | 91952  |
| 43 | <i>n</i> -tritriacontane   | 3308 | 72.996 | 318101 |
| 44 | <i>n</i> -tetratriacontane | 3415 | 74.789 | 244192 |

---

**Table S2.** Efflux pump inhibitory activity of marjoram extracts, essential oil and its constituents by real time ethidium bromide accumulation assay on *E. coli* AG100 strain

| <i>E. coli</i> AG100     | Mean              | SD       | RFI           |
|--------------------------|-------------------|----------|---------------|
| <b>Extracts</b>          | <b>125 µg/mL</b>  |          |               |
| MeOH extract             | 19310             | 98.97474 | -0.1651       |
| <i>n</i> -hexane extract | 20402             | 1749.647 | -0.1179       |
| Essential oil            | 52568             | 1322.622 | <b>1.2729</b> |
|                          | <b>62.5 µg/mL</b> |          |               |
| MeOH extract             | 19045             | 103.1843 | -0.1766       |
| <i>n</i> -hexane extract | 20118             | 121.3768 | -0.1301       |
| Essential oil            | 37865             | 1056.015 | <b>0.6372</b> |
| <b>Compounds</b>         | <b>100 µM</b>     |          |               |
| α-terpinene              | 23049.33          | 273.7158 | -0.0034       |
| γ-terpinene              | 22380.67          | 315.3321 | -0.0323       |
| terpinene-4-ol           | 23107             | 478.091  | -0.0009       |
| sabinene                 | 22778.67          | 603.6094 | -0.0151       |
| sabinene hydrate         | 22168             | 53.11309 | -0.0415       |
| linalool                 | 22026.33          | 419.6931 | -0.0476       |
|                          | <b>50 µM</b>      |          |               |
| α-terpinene              | 23265.67          | 1054.827 | 0.0059        |
| γ-terpinene              | 22887             | 551.1361 | -0.0104       |
| terpinene-4-ol           | 22729             | 676.5006 | -0.0173       |
| sabinene                 | 22180             | 285.454  | -0.0410       |
| sabinene hydrate         | 21983.67          | 1085.728 | -0.0495       |
| linalool                 | 21179.67          | 122.4105 | -0.0843       |
| <b>Controls</b>          |                   |          |               |
| DMSO                     | 23128             | 2065.409 |               |
| <i>E. coli</i> AG100     | 21553.33          | 637.2891 | -0.0681       |
| CCCP                     | 39281.67          | 156.5162 | <b>0.6985</b> |

**Table S3.** Efflux pump inhibitory activity of marjoram extracts, essential oil and its constituents by real time ethidium bromide accumulation assay on *E. coli* ATCC 25922 strain

| <i>E. coli</i> ATCC 25922 | Mean              | SD       | RFI           |
|---------------------------|-------------------|----------|---------------|
| <b>Extracts</b>           | <b>62.5 µg/mL</b> |          |               |
| MeOH extract              | 22441.33          | 1094.717 | -0.1384       |
| <i>n</i> -hexane extract  | 27121             | 1888.161 | 0.0412        |
| Essential oil             | 137226.7          | 1508.068 | <b>4.2684</b> |
|                           | <b>31.2 µg/mL</b> |          |               |
| MeOH extract              | 23364.67          | 544.6332 | -0.1030       |
| <i>n</i> -hexane extract  | 25818             | 1202.07  | -0.0088       |
| Essential oil             | 109732.3          | 7022.362 | <b>3.2129</b> |
| <b>Compounds</b>          | <b>100 µM</b>     |          |               |
| α-terpinene               | 27843.33          | 877.377  | 0.0690        |
| γ-terpinene               | 26368.33          | 350.3574 | 0.0123        |
| terpinene-4-ol            | 27878.67          | 883.148  | 0.0703        |
| sabinene                  | 32590.67          | 10117.96 | 0.2512        |
| sabinene hydrate          | 26600             | 631.3153 | 0.0212        |
| linalool                  | 25667.67          | 344.6452 | -0.0146       |
|                           | <b>50 µM</b>      |          |               |
| α-terpinene               | 26550             | 107.5314 | 0.0193        |
| γ-terpinene               | 27434.67          | 82.97188 | 0.0533        |
| terpinene-4-ol            | 27748             | 692.242  | 0.0653        |
| sabinene                  | 27145.67          | 1438.72  | 0.0422        |
| sabinene hydrate          | 25548.67          | 835.0032 | -0.0191       |
| linalool                  | 25402.33          | 344.1138 | -0.0248       |
| <b>Controls</b>           |                   |          |               |
| DMSO                      | 26047             | 1128.075 |               |
| <i>E. coli</i> ATCC       | 26708.67          | 316.0575 | 0.0254        |
| CCCP                      | 78192.33          | 475.7534 | <b>2.0020</b> |

**Table S4.** Efflux pump inhibitory activity of marjoram extracts, essential oil and its constituents by real time ethidium bromide accumulation assay on *S. aureus* ATCC 25923 strain

| <i>S. aureus</i> ATCC 25923 | Mean              | SD      | RFI         |
|-----------------------------|-------------------|---------|-------------|
| <b>Extracts</b>             | <b>62.5 µg/mL</b> |         |             |
| MeOH extract                | 19704.67          | 1398.57 | -0.17       |
| <i>n</i> -hexane extract    | 22409.33          | 1124.71 | -0.06       |
| Essential oil               | 21324.00          | 954.24  | <b>0.19</b> |
| <b>Compounds</b>            | <b>100 µM</b>     |         |             |
| $\alpha$ -terpinene         | 25220.00          | 638.77  | 0.06        |
| $\gamma$ -terpinene         | 25275.67          | 1974.12 | 0.06        |
| terpinene-4-ol              | 24275.33          | 573.93  | 0.02        |
| sabinene                    | 25065.33          | 570.63  | 0.06        |
| sabinene hydrate            | 23667.67          | 1569.13 | 0.00        |
| linalool                    | 24364.00          | 1147.47 | 0.03        |
| <b>Controls</b>             |                   |         |             |
| DMSO                        | 23751.00          | 389.83  |             |
| <i>S. aureus</i> ATCC       | 26062.00          | 412.66  | 0.10        |
| RES                         | 60508.67          | 5406.55 | <b>1.55</b> |

**Table S5.** Efflux pump inhibitory activity of marjoram extracts, essential oil and its constituents by real time ethidium bromide accumulation assay on *S. aureus* MRSA ATCC 43300 strain

| <b><i>S. aureus</i> MRSA<br/>ATCC 43300</b> | <b>Mean</b>       | <b>SD</b> | <b>RFI</b>  |
|---------------------------------------------|-------------------|-----------|-------------|
| <b>Extracts</b>                             | <b>62.5 µg/mL</b> |           |             |
| MeOH extract                                | 32845.33          | 1461.43   | -0.52       |
| <i>n</i> -hexane extract                    | 95286.33          | 4736.54   | <b>0.39</b> |
| Essential oil                               | 65466.80          | 779.93    | <b>0.35</b> |
| <b>Compounds</b>                            | <b>100 µM</b>     |           |             |
| α-terpinene                                 | 68390.67          | 1351.32   | 0.00        |
| γ-terpinene                                 | 67851.33          | 741.31    | -0.01       |
| terpinene-4-ol                              | 67717.33          | 1342.24   | -0.01       |
| sabinene                                    | 74905.00          | 2669.34   | 0.10        |
| sabinene hydrate                            | 87137.33          | 29123.07  | <b>0.27</b> |
| linalool                                    | 65269.33          | 3227.53   | -0.05       |
| <b>Controls</b>                             |                   |           |             |
| DMSO                                        | 68370.33          | 894.34    |             |
| <i>S. aureus</i> MRSA 43300                 | 72053.67          | 3033.87   | 0.05        |
| RES                                         | 140833.33         | 103221.54 | <b>1.06</b> |
